# Supplementary material for: IMPA2 polymorphisms and risk of ischemic stroke in a northwest Han Chinese population
Source: PubMed Central journal article supplement (PMC5342739; doi:10.18632/oncotarget.12133), 2016-09-20
Supplement: oncotarget-07-75273-s001.pdf [file oncotarget-07-75273-s001.pdf]

# IMPA2 polymorphisms and risk of ischemic stroke in a northwest Han Chinese population

## SUPPLEMENTARY FIGURE AND TABLE

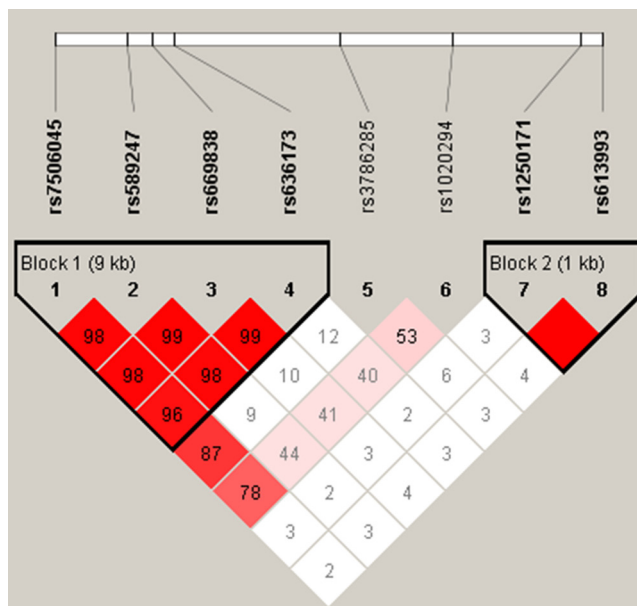

Supplementary Figure S1: Haplotype block map for SNPs in the *IMPA2* gene.

Supplementary Table S1: Primers used for the analysis of *IMP2* polymorphisms

| SNPs      | First PCR (5'→3')                  | Second PCR (5'→3')                  | UEP SEQ (5'→3')                |
|-----------|------------------------------------|-------------------------------------|--------------------------------|
| rs7506045 | ACGTTGGATGTT<br>CCCAGCTGACATAGATGC | ACGTTGGATGGAATGAATAG<br>TGATGTACTC  | GGCACAATGGGAACTTC              |
| rs589247  | ACGTTGGATGGCTTA<br>GTTAGCGAGTAGCTG | ACGTTGGATGTCCCTCAGTCT<br>TAGAGATTT  | aAGGATACCTAACTCATTGC           |
| rs669838  | ACGTTGGATGGCAC<br>ACTGAGCTCACAGTTA | ACGTTGGATGCTGAGTGTATAA<br>ATACCAG   | ttTCCTTTTGTGTACCTTATC          |
| rs636173  | ACGTTGGATGTTG<br>GGATGTGTTCTGTGAGC | ACGTTGGATGACATCACATCAC<br>TGTACTGC  | ccgGTGAGCAGCGGGAAGCC           |
| rs3786285 | ACGTTGGATGTGA<br>GTCCCTCTGCAAACAAG | ACGTTGGATGAGAACATTGTCT<br>CGGTCAGG  | ggaacCAAGCCCCCTACAATC<br>CTCAC |
| rs1020294 | ACGTTGGATGAGAGA<br>GCAGTCTGTTTTTGG | ACGTTGGATGAATCCCAGGCATC<br>AGGTCAC  | GTTTTTGGAGACACGC               |
| rs1250171 | ACGTTGGATGAAAAG<br>GGACACTTGGACCTG | ACGTTGGATGTTACTGCACTCAA<br>TGGACCC  | GAGATTTCTGGGTGAG               |
| rs613993  | ACGTTGGATGAATGC<br>CTTGTGCCATGACAG | ACGTTGGATGTGTCACGTTTCAGTA<br>GAGGAG | ATGCAGCAACCAGAGAA              |

SNPs, single-nucleotide polymorphisms; PCR, PCR primer; UEP, Un-extended mini-sequencing primer.
